# Supplementary material for: WAKL8 Regulates Arabidopsis Stem Secondary Wall Development
Source: MDPI journal article supplement (doi:10.3390/plants11172297), 2022-09-02
Supplement: s1 [file s1]

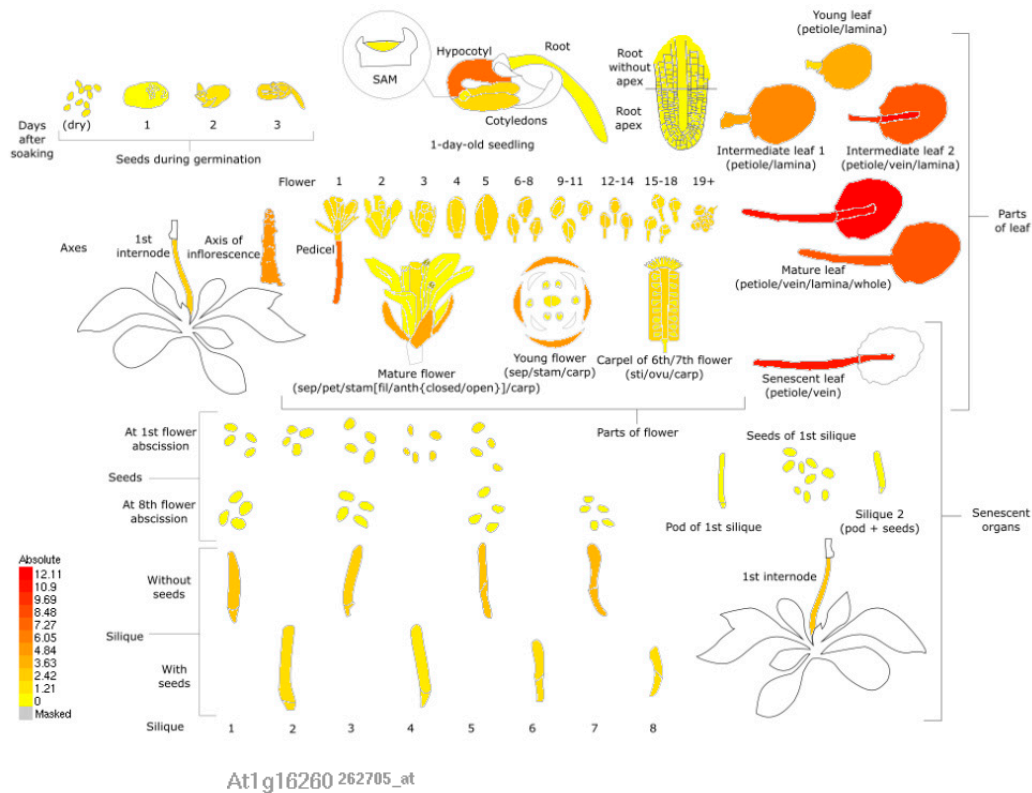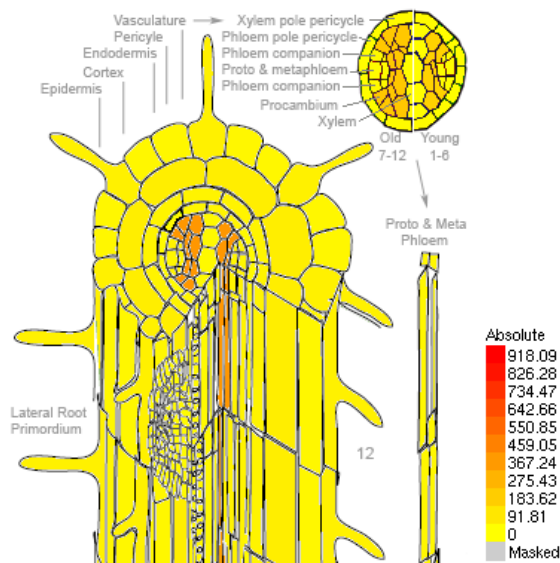

**Figure S1. Expression profiles of WAKL8 during development.** Tissue level expression profile of WAKL8 during Arabidopsis development visualized using eFP Browser [1,2]. The expression levels are represented as a colour gradient from yellow (lowest) to red (highest) and shows that WAKL8 has slightly higher expression levels in stems and mature leaves than other tissues. In primary roots, WAKL8 expression is highest in vascular cell types than other cells [1,3].

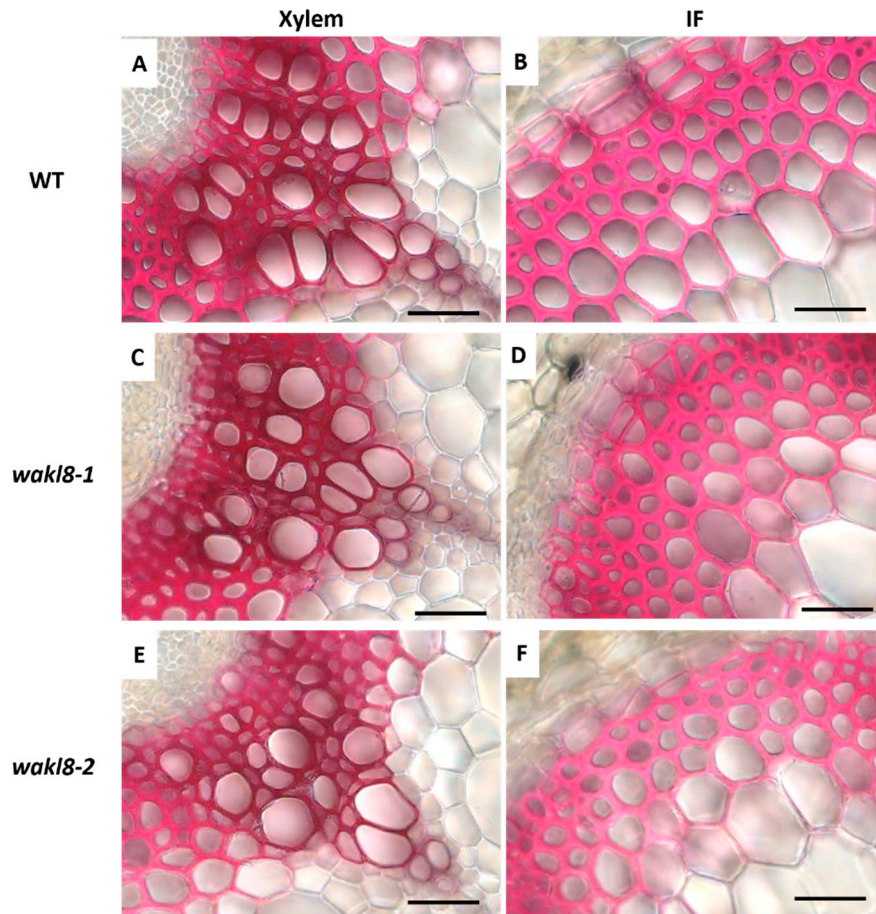

**Figure S2. Phloroglucinol-HCl staining of lignin in transverse sections 1 cm from the stem base of WT, *wakl8-1* and *wakl8-2* plants.** Fresh stems of WT (A-B), *wakl8-1* (C-D) and *wakl8-2* (E-F) plants at growth stage 6.5 were sectioned and stained with phloroglucinol-HCL. Scale bar = 20  $\mu$ m.

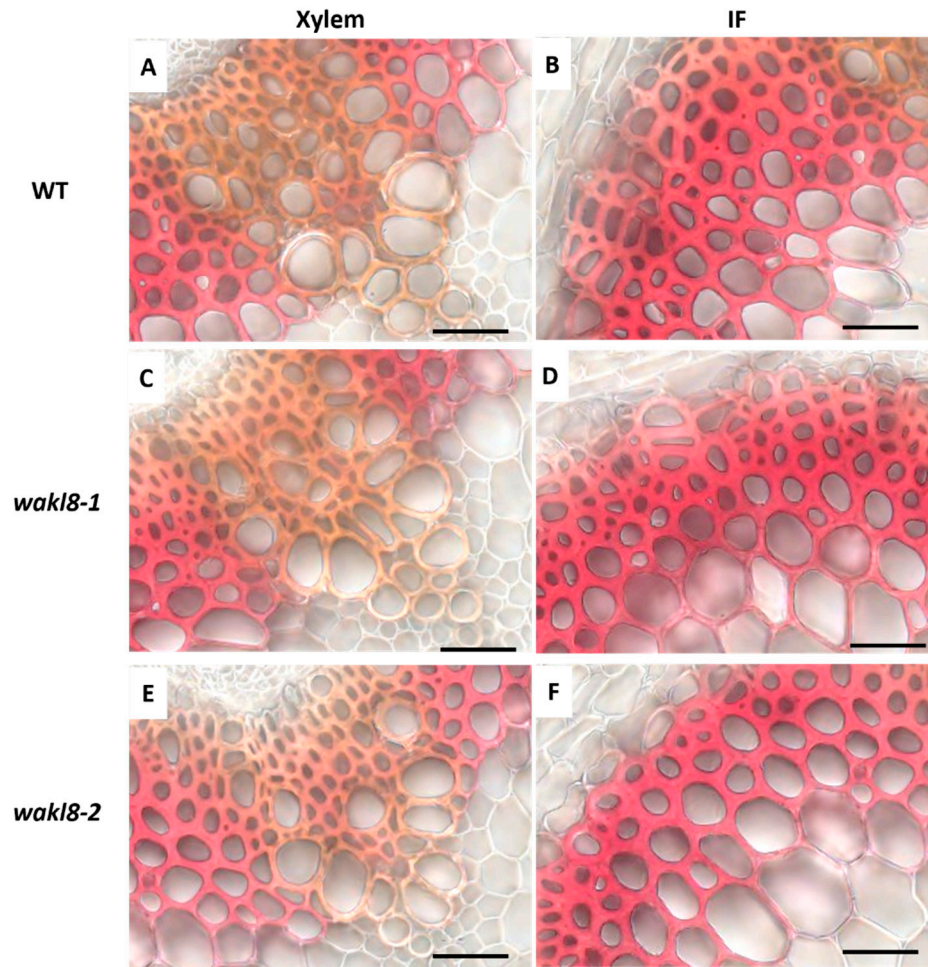

**Figure S3.** Mäule staining of lignin in transverse sections 1 cm from the stem base of WT, *wakl8-1* and *wakl8-2* plants. Fresh stems of WT (A-B), *wakl8-1* (C-D) and *wakl8-2* (E-F) plants at growth stage 6.5 were sectioned and stained with Mäule. Scale bar = 20  $\mu\text{m}$ .



## References

1. Winter, D.; Vinegar, B.; Nahal, H.; Ammar, R.; Wilson, G.V.; Provart, N.J. An “electronic fluorescent pictograph” browser for exploring and analyzing large-scale biological data sets. *PloS one* **2007**, *2*, e718.
2. Klepikova, A.V.; Kasianov, A.S.; Gerasimov, E.S.; Logacheva, M.D.; Penin, A.A. A high resolution map of the arabidopsis thaliana developmental transcriptome based on rna-seq profiling. *The Plant Journal* **2016**, *88*, 1058-1070.
3. Brady, S.M.; Orlando, D.A.; Lee, J.-Y.; Wang, J.Y.; Koch, J.; Dinneny, J.R.; Mace, D.; Ohler, U.; Benfey, P.N. A high-resolution root spatiotemporal map reveals dominant expression patterns. *Science* **2007**, *318*, 801-806.
